# Supplementary material for: Facile synthesis of carbon nanoparticles/graphene composites derived from biomass resources and their application in lithium ion batteries
Source: Royal Society of Chemistry journal article supplement (doi:10.1039/c6ra15690h), 2016-01-01
Supplement: c6ra15690h1.pdf [file c6ra15690h1.pdf]

## Supplementary Information

### **Facile synthesis of carbon nanoparticles/graphene composites derived from biomass resources and their application in lithium ion batteries**

Hongxia Xing,<sup>a</sup> Feng Zhang,<sup>a,\*</sup> Yonggang Lu,<sup>a</sup> Bin Zhai,<sup>a,\*</sup>, Shangru Zhai, Qingda An<sup>a,\*</sup> and Changshun Yu

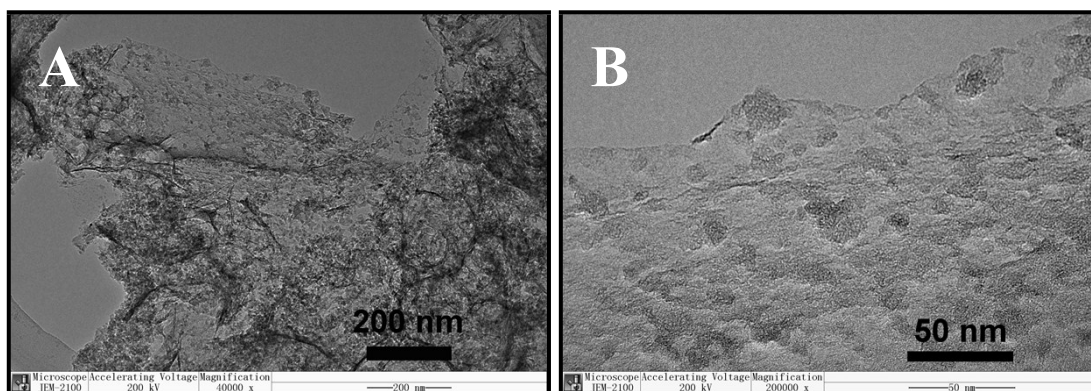

**Fig S1** TEM images of the carbon nanoparticles/graphene composites prepared with 15 g of quartz sand

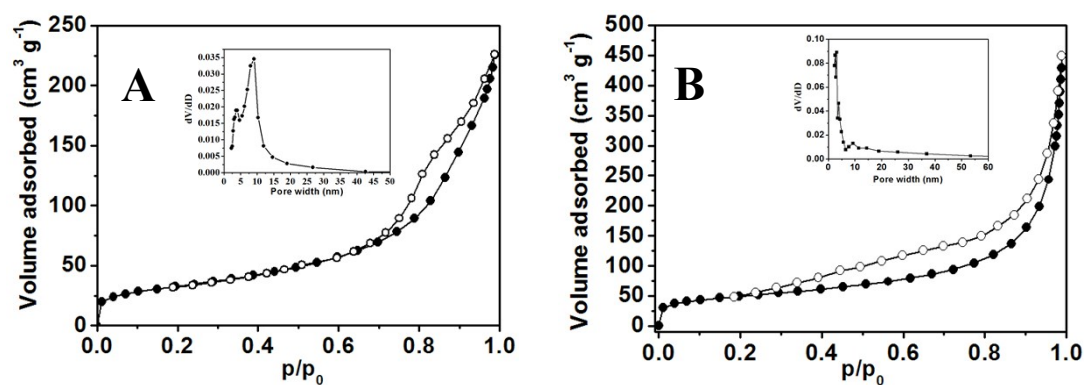

**Fig S2** N<sub>2</sub> adsorption/desorption isotherms for the carbon nanoparticles/graphene composites prepared with (A)15 g and (B) 20 g of quartz sand

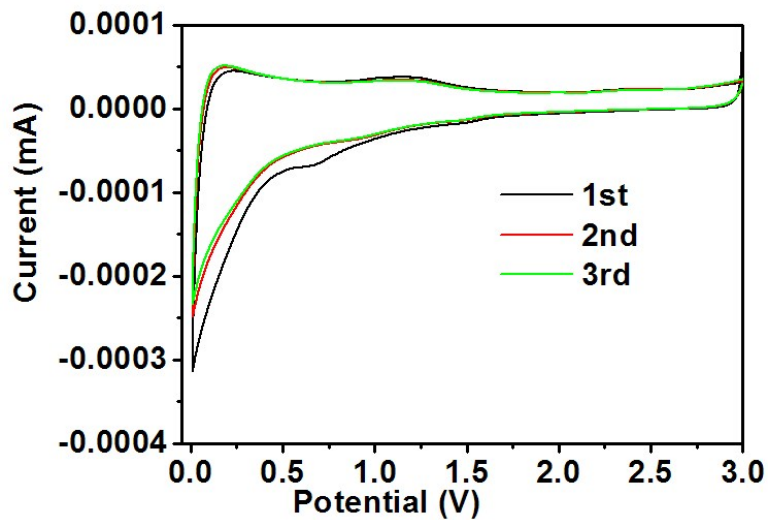

**Fig S3** Cyclic voltammograms of the initial three cycles of the carbon nanoparticles/graphene composites prepared with 30 g of quartz sand (vs Li/Li<sup>+</sup> at a scanning rate of 0.2 mV s<sup>-1</sup>)

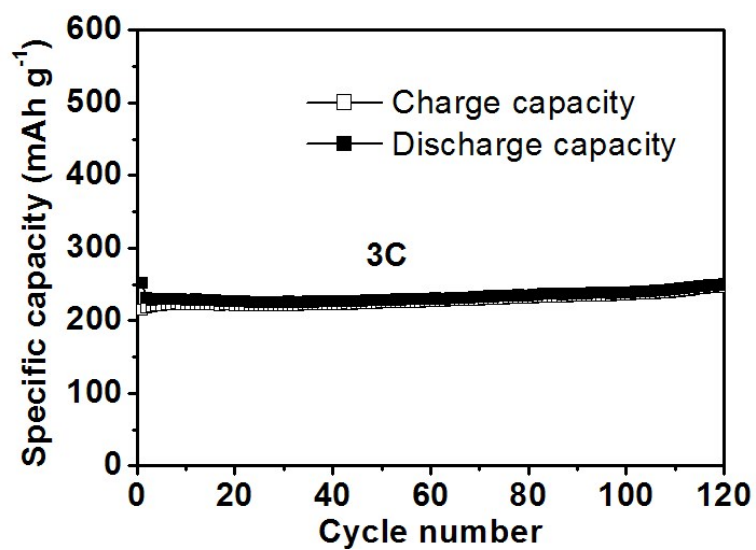

**Fig S4** Cycling performance of the carbon nanoparticles/graphene composites prepared with 30 g of quartz sand at 3C rate

**Table S1** Comparison of electrochemical performance of carbon nanoparticles/graphene composites with other biomass derived carbon electrode materials

| Materials                                | Discharge capacity (mAh g <sup>-1</sup> )                                      | Reference |
|------------------------------------------|--------------------------------------------------------------------------------|-----------|
| Carbon nanoparticles/graphene composites | 370.9 at 1C (372 mA g <sup>-1</sup> )<br>258.8 at 2C (744 mA g <sup>-1</sup> ) | This work |
| Coconut oil derived carbon               | 183 at 0.8 A g <sup>-1</sup>                                                   | 26        |
| Sisal fiber derived carbon               | 283 at 0.1C                                                                    | 35        |
| Rice husk derived carbon                 | 199 at 2C                                                                      | 36        |
| Spongy pomelo peels derived carbon       | 293 at 320 mA g <sup>-1</sup>                                                  | 37        |
| Puffed rice derived carbon               | <300 at 1C                                                                     | 38        |
| Sodium alginate derived carbon           | 224.4 at 2C                                                                    | 39        |
